# Supplementary material for: Surfactant protein-D deficiency suppresses systemic inflammation and reduces atherosclerosis in ApoE knockout mice
Source: Oxford University Press journal article supplement (doi:10.1093/cvr/cvx067), 2017-04-30
Supplement: Supplementary_Material_cvx067.doc [file Supplementary_Material_cvx067.doc]

**Supplemental material**

**Detailed methods**

***Preparation of tissues***

Mice were sacrificed under anesthesia (isoflurane 2.5% inhalation) after a 5-hour fast from 0700 to 1200 hours, and blood samples were collected from the inferior vena cava. At sacrifice, the right atriumwas incised, and the left ventricle was perfused with 10 ml of PBS under a constant flow rate (5 ml/min). From the first batch of mice (n=8 mice per group), the entire aorta from the arch to iliac bifurcation was harvested and liberated from the surrounding fat tissues. The upper half of the heart containing the aortic root was carefully harvested, frozen on a cryostat mount with optimum cutting temperature (OCT) compound (Tissue-Tek), and then stored at -80°C. Blood samples from this set of mice were used only for blood cell counts. From the second batch of mice (n=8-10 mice per group), bronchoalveolar lavage (BAL) was performed on the right lung by intratracheal instillation of PBS (0.6 ml). 50% OCT (0.4 ml)-inflated left lung and carefully harvested brachiocephalic artery were frozen on a cryostat mount with OCT compound. The aortic arch, median lobe of the liver, and spleen were immersed in RNAlater Solution (Qiagen, USA) for RNA extraction. The retroperitoneal adipose tissue was snap-frozen in liquid nitrogen. Liver weight and tissue adiposity from gonadal, retroperitoneal, and subcutaneous inguinal fat regions were measured. Food intake per cage (five mice per cage) per day in ApoE KO and SP-D/ApoE DKO mice were measured one and two days before sacrificed, and the results were averaged for each cage.

***Immunostaining***

Immunofluorescence staining was carried out using antibodies to CD68 (MCA1957, AbD Serotec), Ki67 (SP6, ab16667, Abcam) and alpha-smooth muscle actin (ab5694, Abcam). AlexaFluor 594–conjugated goat anti-rat immunoglobulin G and AlexaFluor 488–conjugated donkey anti-rabbit immunoglobulin G were used for detection. Coverslips were placed over specimens using mounting with medium containing DAPI (H-1500, Vector Laboratories, Inc.) to identify cell nuclei.

Immunoenzyme staining was carried out using antibodies to endothelial nitric oxide synthase (eNOS) (NB300-500, Novus Biologicals) and phospho-eNOS (SAB4300128, Sigma). Polymer AP and Mixed Red Refine (Leica Microsystems) were used for detection. Then slides were hematoxylin stained and mounted. Dihydroethidium (DHE) staining was performed for analysis of oxidative stress. Frozen sections were rinsed in PBS, and incubated in 10 μM DHE (37°C, 30 min; Invitrogen). Then slides were DAPI stained and mounted.

***Plasma analysis***

Total cholesterol and glucose levels were quantified enzymatically using Cholestest (Sekisui Medical Co, Japan) and FUJI DRI-CHEM clinical chemistry analyzer (FUJI DRI-CHEM 3500, Fujifilm, Japan). Plasma insulin, leptin, and adiponectin were measured with commercially available kits according to the manufacturer’s instructions: Mouse Insulin ELISA Kit (Morinaga, Japan), Mouse Leptin ELISA Kit (Morinaga), and Mouse/Rat Adiponectin ELISA kit (Otsuka, Japan), respectively. High-sensitivity C-reactive protein (hsCRP) and interleukin (IL)-9 levels in plasma from additional batch of mice (Supplemental Figure 10) were also measured with commercially available kits: Mouse C-Reactive Protein/CRP Quantikine ELISA Kit (R&D systems, USA) and Mouse IL-9 ELISA Ready-SET-Go! (2nd generation) (Affymetrix, eBioscience, USA), respectively.

***Cytospin analysis and morphometric measurements of airspace size***

After centrifugation, cells pallets in the BAL fluid were re-suspended with PBS, gently mixed and cytospin down to a glass slide and fixed with methanol before staining with H&E. Macrophage count was obtained by dividing the cell pellet into four equal quarter quadrants and then taking four random fields from each quarter quadrant at 400X magnification. Macrophages were determined by morphology. Giant foamy macrophage was defined as a foamy macrophage which is more than twice as large as non-foamy macrophage.

For morphometric analysis, frozen 50% OCT (0.4 ml)-inflated left lung was cut at 5 μm thickness and stained with H&E. Five random fields were photographed. We measured mean linear intercept (Lm=2(length of line) / number of intercepts).

***Analysis of gene expression by real-time quantitative PCR***

Total RNA in liver, spleen, aortic root, and retroperitoneal adipose tissues was isolated using RNeasy Plus Mini kit, RNeasy Lipid Tissue Mini kit, or RNeasy Fibrous Tissue Mini Kit (Qiagen). RNA quality and concentration were measured using NanoDrop technology (Thermo Scientific). cDNA was synthesized with iScript cDNA Synthesis Kit (Bio-Rad) and was evaluated using real-time quantitative PCR (CFX384 Touch Real-Time PCR Detection System, Bio-Rad). The relative amount of mRNA was calculated using ACTB (for aortic arch and spleen) or B2M (for adipose tissue and liver) mRNA as the invariant control. The primers which were used in this study are described in Supplemental Table 2.

***Preliminary in vitro study using RAW264.7 macrophages***

To investigate whether SP-D directly modified macrophage proliferation, we conducted a preliminary in vitro study using RAW264.7 macrophages (Supplemental Figure 15). Cells were obtained from American Type Culture Collection (USA) and maintained in Dulbecco’s modified Eagle’s medium containing 10% fetal bovine serum (FBS), penicillin (100 U/ml) and streptomycin (100 U/ml) at 37°C in humidified atmosphere with 5% CO2. Cells were seeded in 24-well tissue culture plates (4.4 × 104 cells/well). After 24 h incubation, cells were serum deprived (0.2% FBS) for another 24 h, and then treated with recombinant human (rh)SP-D (R&D Systems, USA) (0.1, 0.4, 0.8 ug/ml) or S-nitrosothiol (SNO)-rhSP-D (0.1, 0.4, 0.8, 2.4 ug/ml) for 24 h. In order to generate SNO-rhSP-D, rhSP-D was exposed to L-CysNO (200 μM) in the dark for 30 min at room temperature, and then purified on a G25 Sephadex column (Biorad)[44](#_ENREF_44). The dosage of rhSP-D and SNO-rhSP-D was determined based on a previous basic study[44](#_ENREF_44) and our clinical data of plasma SP-D levels at the risk of CV mortality (Quintile 4: 82-114 ng/ml, Quintile 5: >114 ng/ml)[2](#_ENREF_2). Cell counts analysis was then performed.

**Supplemental figure legends**

**Supplemental Figure 1. Schematic diagram of the experimental study design.**

**Supplemental Figure 2. SP-D deficiency in ApoE KO mice reduces advanced atherosclerotic plaque size at the aortic roots and plaque coverage of the whole aortas.**

(A) Quantification of atherosclerotic plaque size within the aortic root of ApoE KO and SP-D/ApoE DKO mice. Three sections of aortic root were evaluated, and the results were averaged for each animal. (B) Quantification of plaque coverage of the whole aorta. n=8 for each groups. Data represent mean ± SEM. P-values were calculated using the Mann–Whitney U test.

**Supplemental Figure 3. The differences of reactive oxygen species production was not significant between ApoE KO and SP-D/ApoE DKO mice.**

(A) Representative images from brachiocephalic artery lesions of ApoE KO and SP-D/ApoE DKO mice with Dihydroethidium (DHE) staining (red) for detecting reactive oxygen species production. Quantification of (B) reactive oxygen species production was based on DHE staining. Five sections through the brachiocephalic artery (equally spaced at 200 um intervals) were evaluated, and the results were averaged for each animal. n=8-10 for each group. Data represent mean ± SEM. P-values were calculated using the Mann–Whitney U test. Scale bars: 100 μm.

**Supplemental Figure 4. The differences of eNOS production was not significant between ApoE KO and SP-D/ApoE DKO mice.**

(A) Representative images from brachiocephalic artery lesions of ApoE KO and SP-D/ApoE DKO mice with eNOS immunostaining (red). Quantification of (B) eNOS production. Five sections through the brachiocephalic artery (equally spaced at 200 um intervals) were evaluated, and the results were averaged for each animal. n=8-10 for each group. Data represent mean ± SEM. P-values were calculated using the Mann–Whitney U test. Scale bars: 100 μm.

**Supplemental Figure 5. Plasma IL-9 and high-sensitivity C-reactive protein levels.**

(A) Schematic diagram of the additional experimental study design for measuring plasma IL-9 and high-sensitivity C-reactive protein (hsCRP) levels. (B) IL-9 (values below the limit of detection (32 pg/ml) were substituted by the lowest detectable value) and hsCRP levels in plasma. n=8-10 for each group. Data represent mean ± SEM. P-values were calculated using the Mann–Whitney U test.

**Supplemental Figure 6-1 and 6-2. BAL cytokine profiles (IL-6, eotaxin, IP-10, KC, MCP-1, MIP-1alpha, MIP-1beta, IL-2, RANTES, IL-1alpha, IL-1beta, IL-10, IL-12(p40), IL-12(p70), TNF-alpha, and IFN-gamma).** n=8-10 for each group. Data represent mean ± SEM. P-values were calculated using Kruskal-Wallis test with Dunn's multiple comparisons test for selected pairs (ApoE KO vs. WT mice, ApoE KO vs. SP-D/ApoE DKO mice, and WT vs. SP-D KO mice).

**Supplemental Figure 7. SP-D deficiency in ApoE KO mice results in giant foamy alveolar macrophage accumulation in lungs (arrow).** (A) Representative cytospin of BAL cells from ApoE KO and SP-D/ApoE DKO mice. n=10 for each group. (B) Representative images of H&E staining of the left lung from ApoE KO and SP-D/ApoE DKO mice. (C) % giant foamy macrophage / total macrophage in BAL cytospins from the right lung. Giant foamy macrophage was defined as a foamy macrophage which was more than twice the size of a non-foamy macrophage. (D) Airspace size was estimated by determining the mean linear intercept. n=8-9 for each group. Data represent mean ± SEM. P-values were calculated using the Mann–Whitney U test. Scale bars: 50 μm.

**Supplemental Figure 8. The differences of aortic arch gene expression related endothelial activation (eNOS, ICAM1, and VCAM1), pro/anti-inflammation (IL-6, iNOS, TNF-alpha, MCP-1, and IL-10), pro/anti-apoptosis (Bax, Bcl2), cholesterol efflux (ABCA1), and scavenger receptors (Lox1, SRA1, and CD36) were not significant between groups.**

Gene expression in aortic arch was quantified using real-time quantitative PCR. The expression of mRNA in SP-D/ApoE DKO mice was calculated relative to the housekeeping gene ACTB and further normalized to the relative expression level in ApoE KO mice. n=5 for each group. Data represent mean ± SEM. P-values were calculated using the Mann–Whitney U test.

**Supplemental Figure 9. Preliminary in vitro study suggested recombinant human SP-D or S-nitrosothiol recombinant human SP-D did not have a direct effect on RAW264.7 macrophage proliferation.**

Cell count analyses of RAW264.7 macrophages treated for 24 h with recombinant human (rh)SP-D (R&D Systems, USA) (0.1, 0.4, 0.8 ug/ml) or S-nitrosothiol (SNO)-rhSP-D (0.1, 0.4, 0.8, 2.4 ug/ml). n=1 for each.
